# Supplementary material
Source: PubMed Central journal article supplement (PMC6202175)
Supplement: NIHMS976898-supplement-Supplement.pdf [file NIHMS976898-supplement-Supplement.pdf]

**Supplemental Table I.**

Baseline characteristics among White and Black subjects with follow-up

|                                          | <b>White (n=474)</b> | <b>Black (n=144)</b> | <b>P-Value</b> |
|------------------------------------------|----------------------|----------------------|----------------|
| Age, years                               | 68.1 (12.9)          | 58.8 (11.7)          | <0.001         |
| Male                                     | 309 (65.2)           | 73 (50.7)            | 0.002          |
| Body Mass Index kg/m <sup>2</sup>        | 28.7 (6)             | 30.6 (7.6)           | 0.01           |
| Smoking                                  | 309 (65.2)           | 91 (63.2)            | 0.66           |
| Diabetes                                 | 163 (34.4)           | 73 (50.7)            | <0.001         |
| Hypertension                             | 420 (88.6)           | 131 (91.0)           | 0.42           |
| Hypercholesterolemia                     | 346 (73.0)           | 95 (66.0)            | 0.10           |
| Estimated GFR mL/min/1.73 m <sup>2</sup> | 68.9 (22.8)          | 65.7 (39.2)          | 0.92           |
| History of coronary artery disease       | 434 (91.6)           | 128 (88.9)           | 0.33           |
| History of myocardial infarction         | 92 (19.4)            | 28 (19.4)            | 1.00           |
| History of PCI                           | 223 (47.1)           | 52 (36.1)            | 0.02           |
| History of CABG                          | 125 (26.4)           | 22 (15.3)            | 0.006          |
| History of heart failure                 | 140 (29.5)           | 54 (37.5)            | 0.07           |
| Ejection fraction %                      | 54.8 (11.7)          | 51.6 (14.5)          | 0.07           |
| ACE/ARB use                              | 228 (48.1)           | 71 (49.3)            | 0.80           |
| Aspirin use                              | 362 (76.4)           | 111 (77.1)           | 0.86           |
| Clopidogrel use                          | 179 (37.8)           | 42 (29.2)            | 0.06           |
| Statin use                               | 316 (66.7)           | 91 (63.2)            | 0.44           |
| Beta blocker use                         | 331 (69.8)           | 106 (73.6)           | 0.38           |

*Data presented as n (%) and mean ± SD.**GFR=Glomerular filtration rate**PCI=Percutaneous coronary intervention**CABG=Coronary artery bypass surgery**ACE/ARB=Angiotensin converting enzyme inhibitors/Angiotensin receptor blockers*

Our initial gate isolated the mononuclear cells (MNC's) as the primary population of interest and from there we drilled down into two gating strategies:

- 1 - MNC/CD34/CD45 med/Quadrant gates - Quadrant gates for VEGF, CD133, and CXCR4
- 2- MNC/CD45-/CD34+++/Quadrant gates - Quadrant gates for VEGF, CD133, and CXCR4
